# Supplementary material for: Enhancement in the active site exposure in a porphyrin-based PIL/graphene composite catalyst for the highly efficient conversion of CO2
Source: Royal Society of Chemistry journal article supplement (doi:10.1039/d1dt04338b), 2022-01-01
Supplement: d1dt04338b1.pdf [file d1dt04338b1.pdf]

## Supporting Information

### **Enhancement in the active site exposure in porphyrin-based PILs /graphene composite catalyst for highly efficient conversion of CO<sub>2</sub>**

Xiao-Xuan Guo<sup>a</sup>, Feng-Lei Zhang<sup>b</sup>, Yaseen Muhammad<sup>c</sup>, Dong-Liang Hu<sup>d</sup>, Zhao-Tian Cai<sup>a</sup>, Guo-Min Xiao<sup>\*a</sup>

<sup>a</sup> *School of Chemistry and Chemical Engineering, Southeast University, Nanjing 211189, China*

<sup>b</sup> *Intelligent Transportation System Research Center, Southeast University, Nanjing 211189, China*

<sup>c</sup> *Institute of Chemical Sciences, University of Peshawar, 25120, KP, Pakistan*

<sup>d</sup> *School of Transportation, Southeast University, Nanjing 211189, China*

\*Corresponding author: Guo-Min Xiao. Tel.: +86-25-52090612; fax: +86-25-52090612.

*E-mail: [xiaogm426@gmail.com](mailto:xiaogm426@gmail.com)*

## 1. Characterization

$^1\text{H}$  NMR measurements were conducted on a Bruker Avance III 600 MHz spectrometer, which used  $\text{CDCl}_3$  as solvent and tetramethylsilane as internal standard. Solid-State  $^{13}\text{C}$  Nuclear Magnetic Resonance spectra were performed with a Bruker Avance III 400 MHz spectrometer. Molecular weight determination was performed by Bruker Ultraflex extreme MALDI-TOF-MS. FT-IR spectra were recorded from 400 to 4000  $\text{cm}^{-1}$  in a Nicolet 5700 spectrometer using potassium bromide pellets. Powder X-ray diffraction measurements were carried out on an Ultima IV diffractometer over a  $2\theta$  range from 10 to 80  $^\circ$  using a step size of 0.02  $^\circ\text{s}^{-1}$  and a dwell time of 1 s per step. The Raman spectrum data was obtained by Lab RAM HR evolution Raman spectrometer at the wavelength of 532  $\text{cm}^{-1}$ . X-ray photoelectron spectroscopy (XPS) analyses were performed on a Thermo Fisher Scientific ESCALAB 250 spectrometer with a monochromatized Al  $\text{K}\alpha$  X-ray source ( $h\nu = 1486.6$  eV) excitation source under a base pressure of  $2 \times 10^{-9}$  mbar. Elemental analyses (EA) for C, H, and N were detected on a Vario EL III cube instrument. Inductively coupled plasma-optical emission spectroscopy (ICP-OES) measurements were conducted on a SpectroBLUE ICP-OES. Samples were first digested in concentrated  $\text{HNO}_3$  and then decomposed with a digestion instrument at 120  $^\circ\text{C}$ . The suspension was filtered, and the supernatant was diluted to the desired concentrations. The  $\text{NH}_3$ -temperature-programmed desorption ( $\text{NH}_3$ -TPD) was detected through a TP-5076 catalyst analyzer (Xianquan Industrial and Trading Co., Ltd., Tianjin, China). Typically, moderate catalysts (same amount of Zn) were degassed at 150  $^\circ\text{C}$  under flowing helium (He) gas for 1 h, and then cooled to 30  $^\circ\text{C}$ . Next, the sample was exposed to  $\text{NH}_3$  atmosphere gas for 30 min. To remove the physically adsorbed  $\text{NH}_3$ , the sample was purged with helium (He) gas for another 1 h. After that, the desorption curve of the samples at 30  $^\circ\text{C}$  to 450  $^\circ\text{C}$  with a ramp of 10  $^\circ\text{C}/\text{min}$  was recorded in He flow. The morphology and size of the catalyst were characterized by a scanning electron microscope (SEM, FEI Inspect F50) and

transmission electron microscope (TEM, Talos F200X). The N<sub>2</sub> absorption-desorption isotherms were determined at 77 K with a BeiShiDe-PS(M) Instrument. The CO<sub>2</sub> sorption isotherms were collected with Micromeritics ASAP 2460 3.01 analyzers at 273K and 298K, respectively. Before these tests, the samples were outgassed in a vacuum at 120 °C for more than 12 h. The reaction filtrates were analyzed by gas chromatography (GC, Shanghai Jingke GC126) equipped with an OV-1701 column and an FID detector. GC-MS (Agilent 7890B) was used to identify the substrate and products.

## 2. Synthesis of catalysts

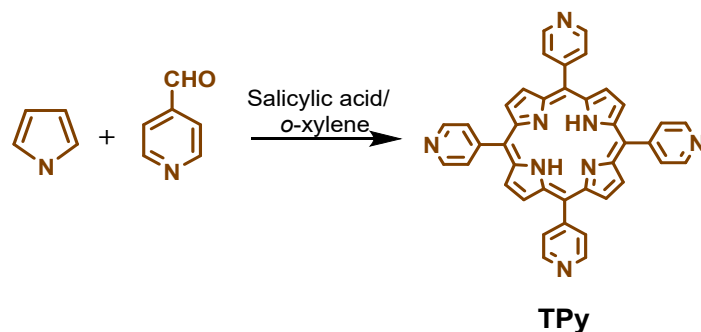

**Scheme S1** Schematic illustration for the synthesis of TPy monomer.

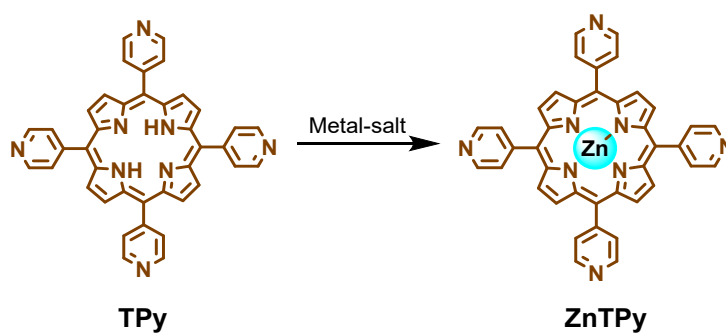

**Scheme S2** Schematic illustration for the synthesis of ZnTPy monomer.

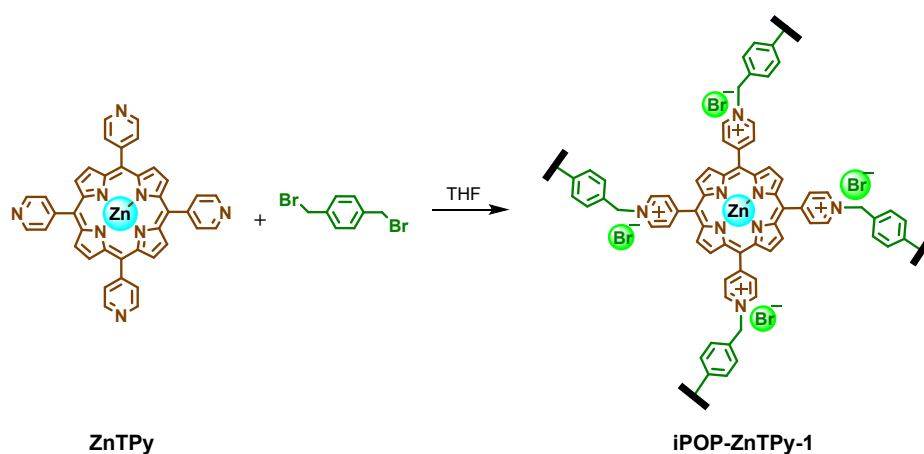

**Scheme S3** Schematic illustration for the synthesis of iPOP-ZnTPy-1.

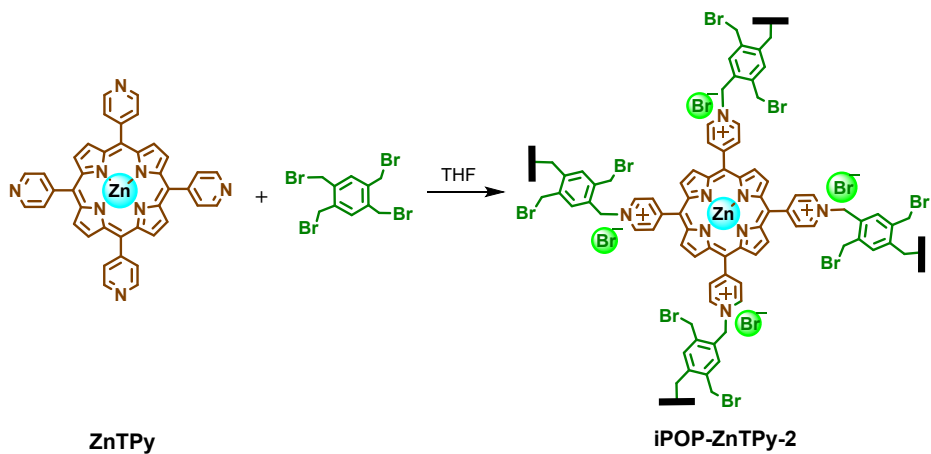

**Scheme S4** Schematic illustration for the synthesis of iPOP-ZnTPy-2.

### 3. Supplementary Figures

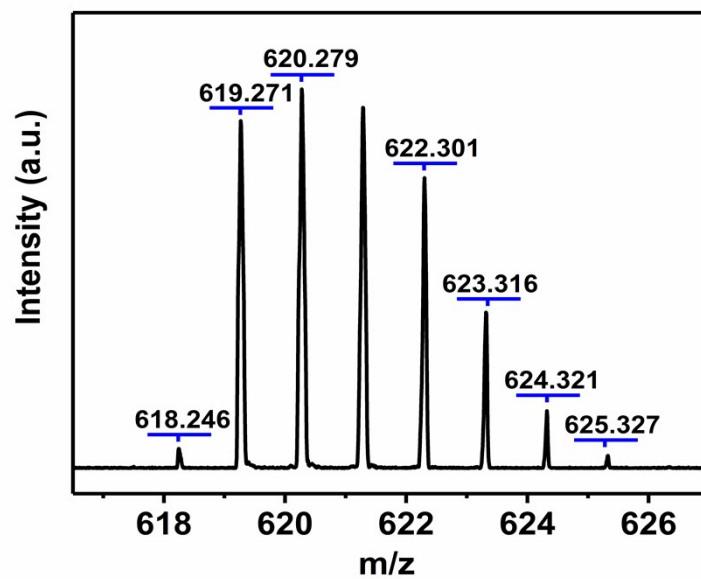

Fig. S1 MALDI-TOF-MS of TPy monomer.

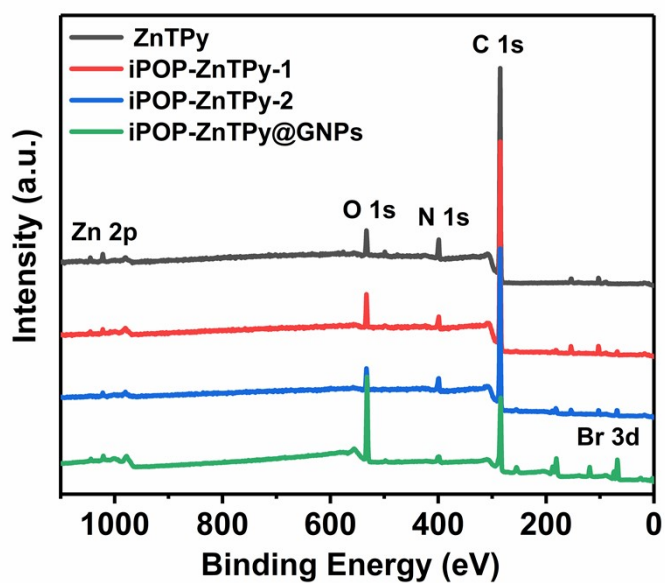

Fig. S2 X-ray photoelectron spectra (XPS) of ZnTPy, iPOP-ZnTPy-n and iPOP-ZnTPy@GNFs.

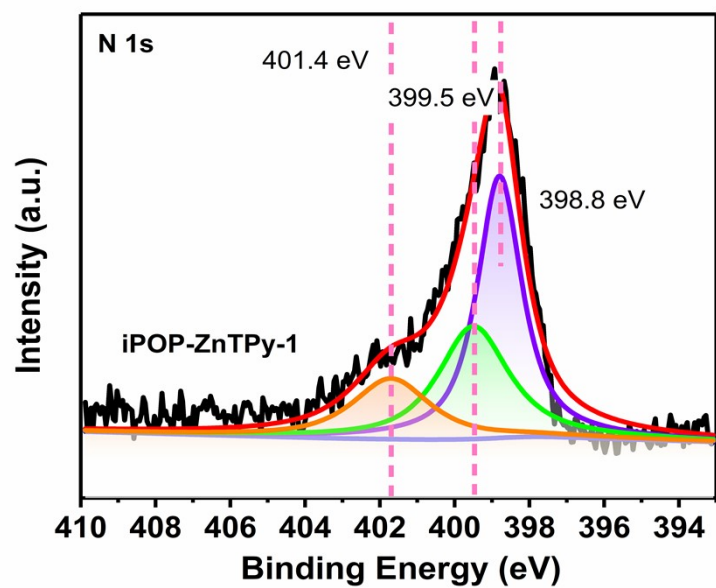

Fig. S3 N 1s XPS spectra of iPOP-ZnTPy-1.

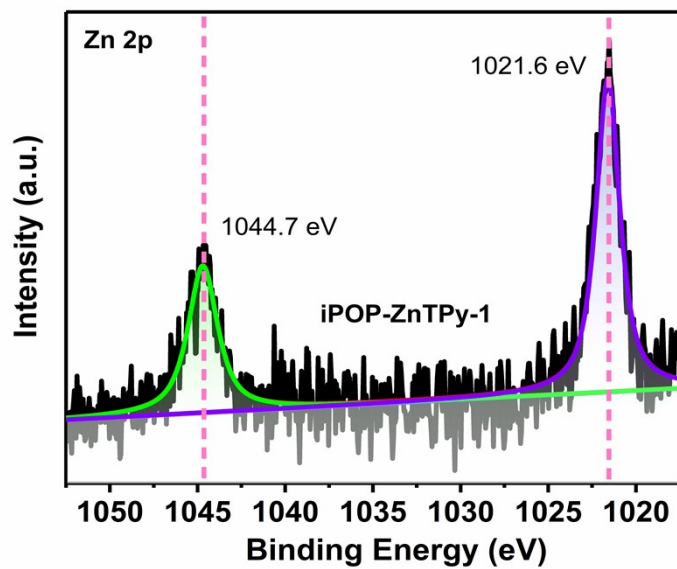

Fig. S4 Zn 2p XPS spectra of iPOP-ZnTPy-1.

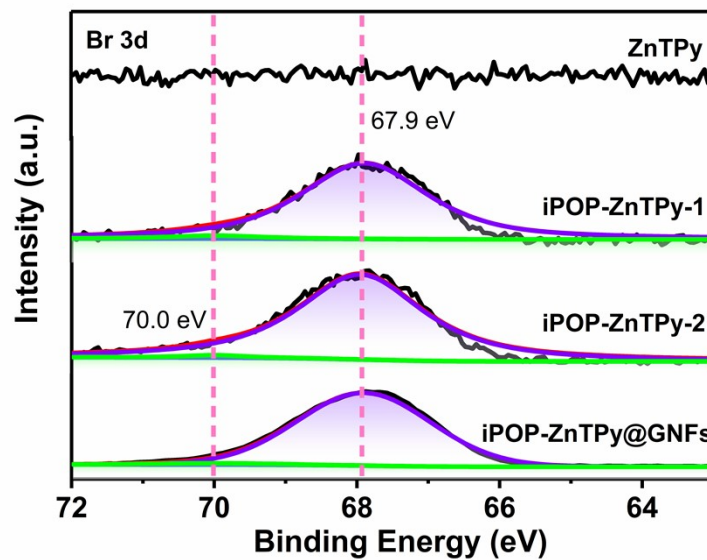

Fig. S5 Br 3d XPS spectra of ZnTPy, iPOP-ZnTPy-n and iPOP-ZnTPy@GNFs.

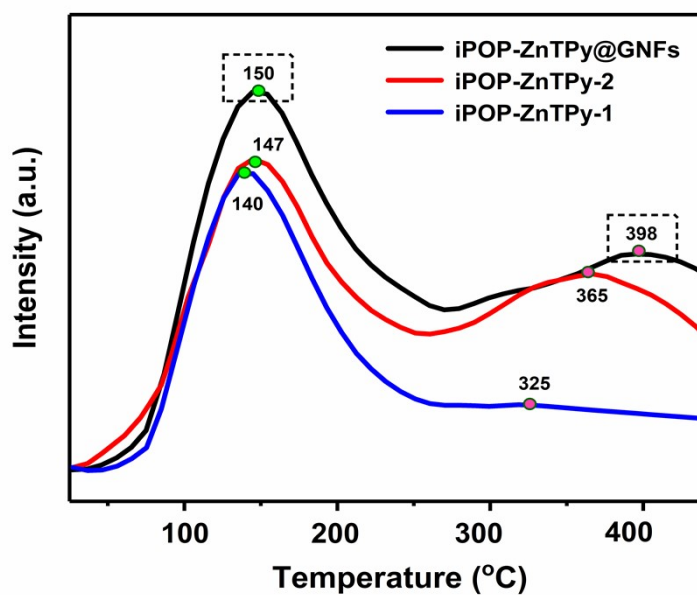

Fig. S6 NH<sub>3</sub>-TPD curves of iPOP-ZnTPy-n and iPOP-ZnTPy@GNFs.



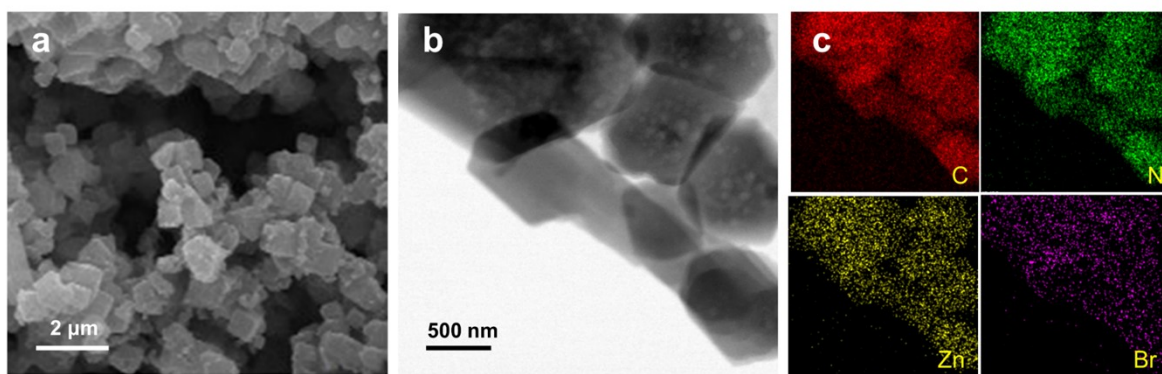

**Fig. S7** (a) SEM image, (b) TEM image and (c) element mapping of iPOP-ZnTPy-1.

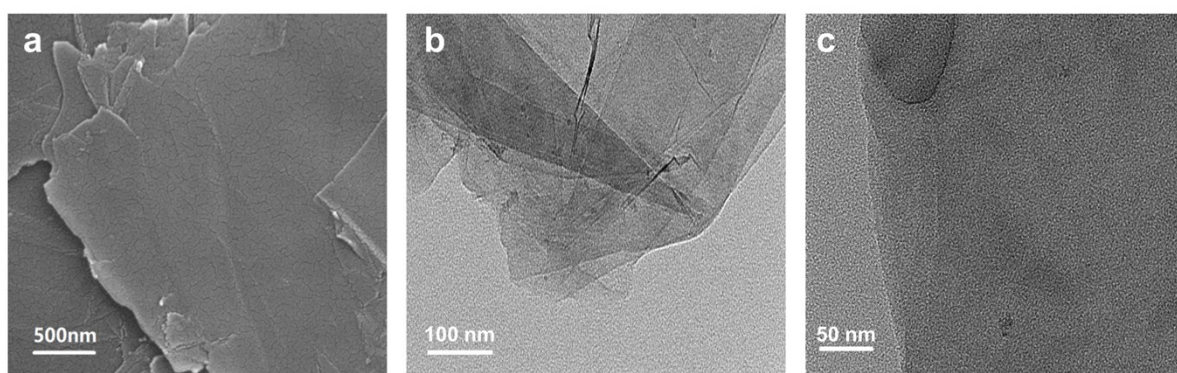

**Fig. S8** SEM and TEM image of GNFs.

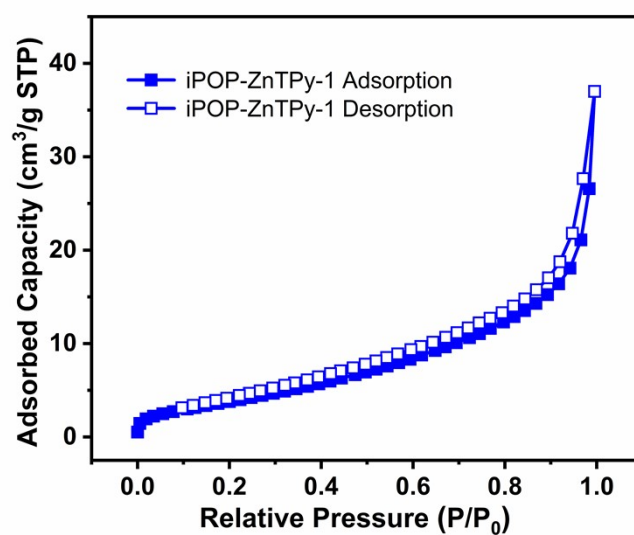

**Fig. S9** N<sub>2</sub> adsorption-desorption isotherms at 77 K of iPOP-ZnTPy-1.

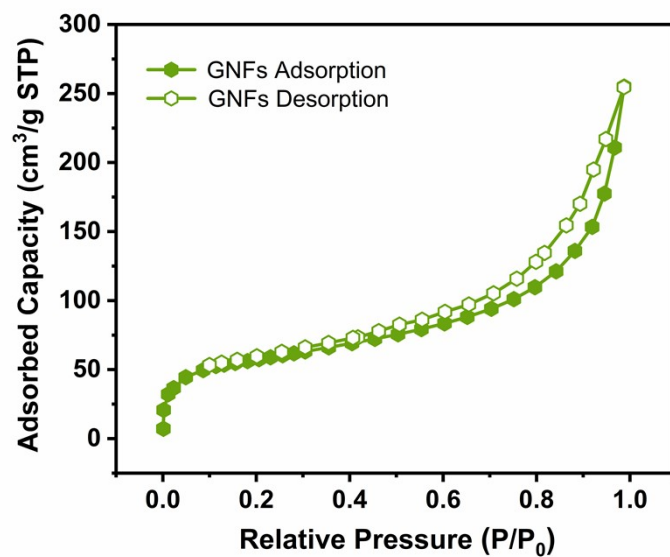

Fig. S10 N<sub>2</sub> adsorption-desorption isotherms at 77 K of GNFs.

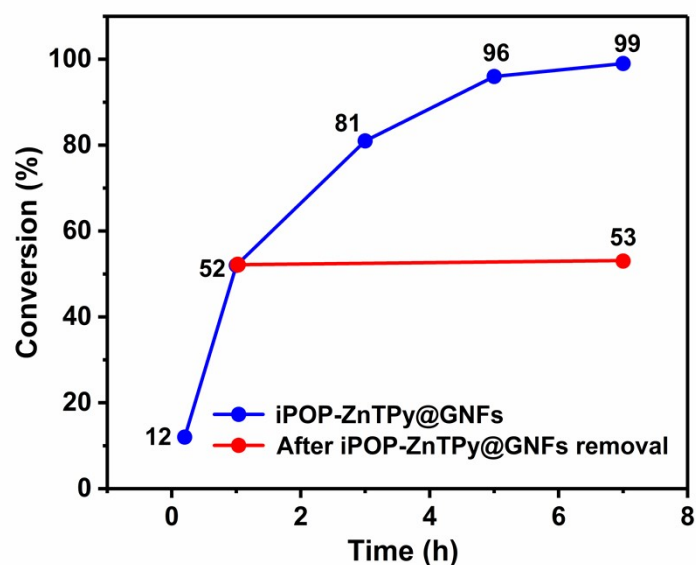

Fig. S11 The leaching test of iPOP-ZnTPy@GNFs for the cycloaddition reaction of CO<sub>2</sub> with PO. [Reaction conditions: PO (10.0 mmol), iPOP-ZnTPy@GNFs (S/C =1000), CO<sub>2</sub> 1.5 MPa, 80 °C.]

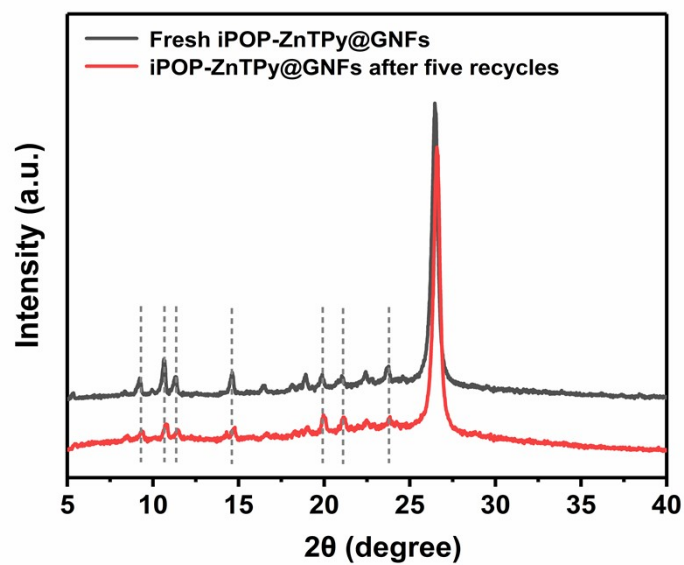

Fig. S12 XRD patterns of iPOP-ZnTPy@GNFs after five recycles.

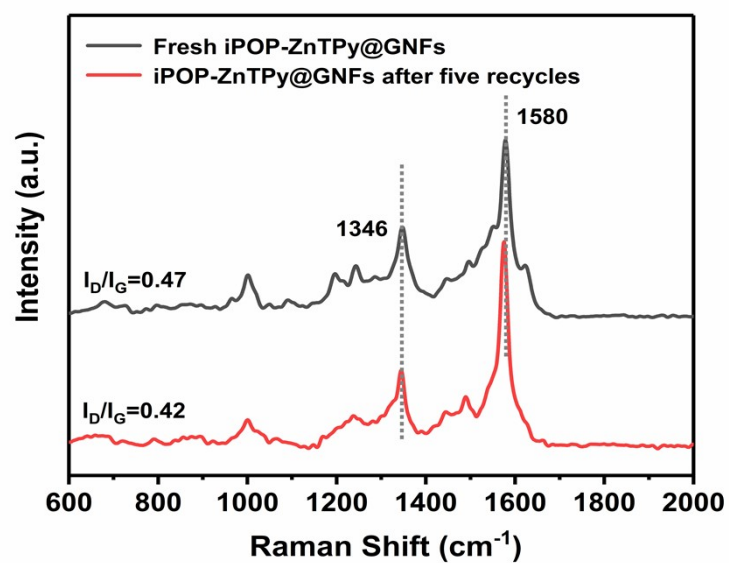

Fig. S13 Raman patterns of iPOP-ZnTPy@GNFs after five recycles.

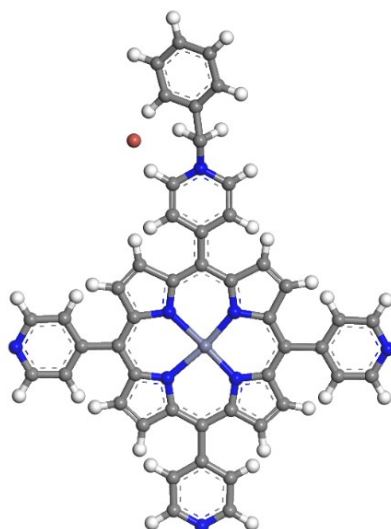

**Fig. S14** The structure of model catalyst **ZnTPy-Br**. [Grey = carbon, white = hydrogen, blue = nitrogen, red = oxygen, purple = zinc, brown = bromine.]

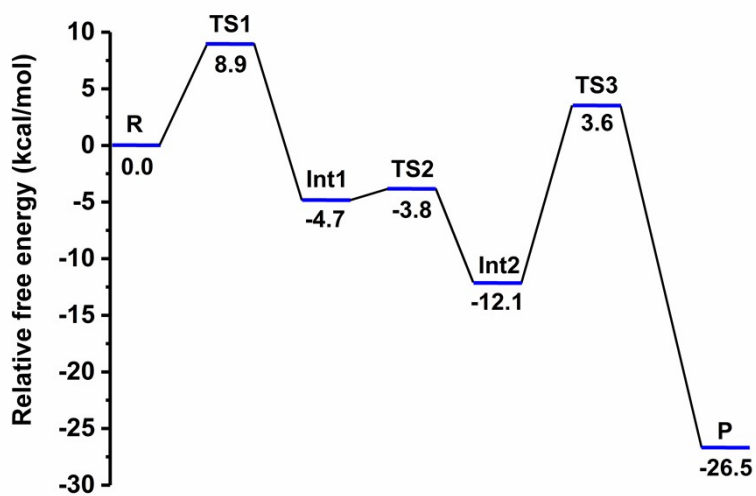

**Fig. S15** B3LYP free energy spectra for the cycloaddition reaction of  $\text{CO}_2$  with PO over **ZnTPy-Br**. [The relative energies are given in  $\text{kcal mol}^{-1}$  and relative to R1.]

## 4. Supplementary Tables

**Table S1** The element content of **iPOP-ZnTPy-n** and **iPOP-ZnTPy@GNFs**.

| Catalyst        | Found (wt%) |       |      |      |
|-----------------|-------------|-------|------|------|
|                 | C           | N     | H    | Zn   |
| ZnTPy           | 67.95       | 15.43 | 4.43 | 8.01 |
| iPOP-ZnTPy-1    | 66.99       | 14.65 | 3.93 | 3.17 |
| iPOP-ZnTPy-2    | 59.55       | 12.95 | 4.33 | 3.05 |
| iPOP-ZnTPy@GNFs | -           | -     | -    | 1.06 |

**Table S2** BET surface area, CO<sub>2</sub> uptakes, isosteric heat of CO<sub>2</sub> adsorption for various catalysts.

| Catalyst        | BET surface area                   | CO <sub>2</sub> uptakes     | CO <sub>2</sub> uptakes     | -Q <sub>st</sub> for CO <sub>2</sub> |
|-----------------|------------------------------------|-----------------------------|-----------------------------|--------------------------------------|
|                 | (m <sup>2</sup> ·g <sup>-1</sup> ) | (mg·g <sup>-1</sup> )-273 K | (mg·g <sup>-1</sup> )-298 K | (KJ·mol <sup>-1</sup> )              |
| iPOP-ZnTPy-1    | 14.6                               | -                           | -                           | -                                    |
| iPOP-ZnTPy-2    | 18.9                               | 33.0                        | 17.8                        | 24.4-23.6                            |
| iPOP-ZnTPy@GNFs | 119.3                              | 46.0                        | 27.5                        | 29.7-24.1                            |
| GNFs            | 184.2                              |                             |                             |                                      |

**Table S3** Catalytic activities comparison of different one-component polymer catalysts for the cycloaddition reaction of CO<sub>2</sub> with PO.

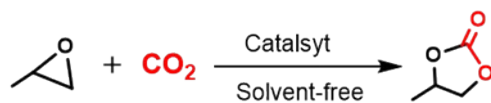

| Entry | Catalyst                             | Amount of catalyst/mol% | T/°C | P <sub>CO<sub>2</sub></sub> /Mpa | t /h | Yield/% | STY/h <sup>-1</sup> | Ref.      |
|-------|--------------------------------------|-------------------------|------|----------------------------------|------|---------|---------------------|-----------|
| 1     | PIM2                                 | 0.2                     | 130  | 1                                | 10   | 93      | 46.5                | 1         |
| 2     | PS-HEIMBr                            | 1.6                     | 120  | 2.5                              | 4    | 98      | 15.3                | 2         |
| 3     | Py-Zn@MA                             | 0.28                    | 120  | 2                                | 6    | 81      | 48.2                | 3         |
| 4     | POM3-IM                              | 5                       | 120  | 1                                | 8    | 92      | 2.3                 | 4         |
| 5     | Al-CPOP                              | 1                       | 120  | 0.1                              | 24   | 67      | 2.8                 | 5         |
| 6     | Py-Im-6-Zn-5-SCD                     | 0.01                    | 120  | 0.1                              | 4    | 99      | 2475                | 6         |
| 7     | PSIL                                 | 0.68                    | 110  | 6                                | 7    | 97      | 20.4                | 7         |
| 8     | SYSU-Zn@IL2                          | 0.16                    | 100  | 1                                | 10   | 99      | 61.9                | 8         |
| 9     | CPP-IL0.05                           | 0.16                    | 100  | 0.1                              | 24   | 96      | 25                  | 9         |
| 10    | PP-Br-Zn-0.09                        | 0.05                    | 100  | 1.5                              | 3    | 95      | 660                 | 10        |
| 11    | Co-HIP                               | 0.1                     | 80   | 0.1                              | 20   | 96      | 48                  | 11        |
| 12    | POF-Zn <sup>2+</sup> -I <sup>-</sup> | 0.3                     | 60   | 1                                | 8    | 99      | 41.3                | 12        |
| 13    | DVB@ISA                              | 0.25                    | 60   | 1                                | 24   | 99      | 16.5                | 13        |
| 14    | <b>iPOP-ZnTPy@GNFs</b>               | 0.1                     | 120  | 1.5                              | 0.7  | 99      | 1507                | This work |
|       |                                      |                         | 100  | 1.5                              | 3    | 99      | 330                 |           |
|       |                                      |                         | 80   | 1.5                              | 7    | 99      | 141.4               |           |
|       |                                      |                         | 60   | 1.5                              | 13   | 99      | 76.2                |           |

**Table S4** Cartesian coordinates (Å) of the optimized structures of all intermediates and transition states at B3LYP/6-31G\* level of theory.

**1-R1**

|    |             |             |             |
|----|-------------|-------------|-------------|
| N  | -0.70710000 | -1.68000000 | -1.51920000 |
| N  | -3.07200000 | -0.53270000 | -0.34780000 |
| N  | 0.41120000  | 0.93230000  | -1.74310000 |
| N  | -1.88000000 | 2.08360000  | -0.44120000 |
| Zn | -1.16660000 | 0.14900000  | -0.68590000 |
| C  | 0.51660000  | -3.45250000 | -2.31430000 |
| C  | -0.76470000 | -3.89340000 | -2.15920000 |
| C  | 0.53320000  | -2.05780000 | -1.91280000 |
| C  | -1.52590000 | -2.79020000 | -1.61240000 |
| C  | -2.85420000 | -2.84830000 | -1.19300000 |
| C  | -4.89200000 | -1.90090000 | -0.01920000 |
| C  | -5.17590000 | -0.70190000 | 0.57120000  |
| C  | -3.56720000 | -1.78730000 | -0.58250000 |
| C  | -4.03080000 | 0.15100000  | 0.36140000  |
| C  | 1.64550000  | -1.16890000 | -2.03630000 |
| C  | 1.75950000  | 2.36240000  | -2.95120000 |
| C  | 2.24580000  | 1.10230000  | -3.11160000 |
| C  | 0.64430000  | 2.26690000  | -2.03520000 |
| C  | 1.42680000  | 0.22780000  | -2.29440000 |
| C  | 0.01140000  | 3.33890000  | -1.41050000 |
| C  | -2.78640000 | 3.75400000  | 0.86330000  |
| C  | -1.69520000 | 4.27800000  | 0.22820000  |
| C  | -2.90900000 | 2.38320000  | 0.42280000  |
| C  | -1.14150000 | 3.22360000  | -0.58940000 |
| C  | -3.92650000 | 1.48670000  | 0.79600000  |
| C  | 2.98010000  | -1.61070000 | -1.69830000 |

|   |             |             |             |
|---|-------------|-------------|-------------|
| C | 4.09800000  | -0.73600000 | -1.72490000 |
| C | 5.29530000  | -1.07990000 | -1.15510000 |
| N | 5.48130000  | -2.27710000 | -0.54910000 |
| C | 4.44080000  | -3.15920000 | -0.49660000 |
| C | 3.22790000  | -2.86600000 | -1.05500000 |
| C | 6.48120000  | -2.90890000 | 4.06580000  |
| C | 5.92220000  | -1.69090000 | 4.45060000  |
| C | 5.59940000  | -0.73760000 | 3.48220000  |
| C | 5.83610000  | -0.99090000 | 2.13290000  |
| C | 6.40150000  | -2.21360000 | 1.74630000  |
| C | 6.71660000  | -3.17000000 | 2.71510000  |
| C | 6.67830000  | -2.50400000 | 0.28640000  |
| C | -3.55880000 | -4.15610000 | -1.31000000 |
| C | -4.66490000 | -4.31830000 | -2.15190000 |
| C | -5.28590000 | -5.56450000 | -2.21940000 |
| N | -4.89040000 | -6.63490000 | -1.51850000 |
| C | -3.83540000 | -6.47080000 | -0.71030000 |
| C | -3.14330000 | -5.26900000 | -0.56930000 |
| C | -4.98490000 | 1.98010000  | 1.71860000  |
| C | -5.81720000 | 3.05620000  | 1.38770000  |
| C | -6.78820000 | 3.46530000  | 2.30030000  |
| N | -6.98080000 | 2.89020000  | 3.49400000  |
| C | -6.18120000 | 1.86150000  | 3.80420000  |
| C | -5.18290000 | 1.37090000  | 2.96470000  |
| C | 0.66410000  | 4.66990000  | -1.52200000 |
| C | -0.02170000 | 5.80140000  | -1.98210000 |
| C | 0.65640000  | 7.01620000  | -2.05260000 |
| N | 1.93810000  | 7.17700000  | -1.69740000 |
| C | 2.58350000  | 6.09020000  | -1.25250000 |



|    |             |             |             |
|----|-------------|-------------|-------------|
| C  | 2.00650000  | 4.82480000  | -1.14530000 |
| Br | 4.07750000  | 1.74880000  | 0.20930000  |
| H  | 1.34430000  | -3.99130000 | -2.75220000 |
| H  | -1.16220000 | -4.86510000 | -2.41050000 |
| H  | -5.51680000 | -2.77990000 | -0.05950000 |
| H  | -6.08200000 | -0.41810000 | 1.08410000  |
| H  | 2.11370000  | 3.27200000  | -3.41110000 |
| H  | 3.04930000  | 0.78920000  | -3.76060000 |
| H  | -3.43890000 | 4.25050000  | 1.56500000  |
| H  | -1.29510000 | 5.27610000  | 0.31940000  |
| H  | 4.01690000  | 0.29000000  | -2.03730000 |
| H  | 6.10930000  | -0.37010000 | -1.09830000 |
| H  | 4.62350000  | -4.07320000 | 0.05370000  |
| H  | 2.43020000  | -3.58000000 | -0.91380000 |
| H  | 6.72980000  | -3.65750000 | 4.81170000  |
| H  | 5.73610000  | -1.48620000 | 5.50040000  |
| H  | 5.16170000  | 0.21390000  | 3.76700000  |
| H  | 5.54480000  | -0.23250000 | 1.40700000  |
| H  | 7.14990000  | -4.12100000 | 2.41500000  |
| H  | 6.99830000  | -3.53970000 | 0.14750000  |
| H  | 7.46420000  | -1.85790000 | -0.11330000 |
| H  | -5.02730000 | -3.48710000 | -2.74730000 |
| H  | -6.14340000 | -5.71020000 | -2.87320000 |
| H  | -3.52800000 | -7.34570000 | -0.14070000 |
| H  | -2.30430000 | -5.18520000 | 0.11260000  |
| H  | -5.71490000 | 3.55470000  | 0.43000000  |
| H  | -7.44750000 | 4.29600000  | 2.05670000  |
| H  | -6.34500000 | 1.40470000  | 4.77820000  |
| H  | -4.55770000 | 0.53900000  | 3.26960000  |

|   |             |             |             |
|---|-------------|-------------|-------------|
| H | -1.05890000 | 5.72910000  | -2.29210000 |
| H | 0.14450000  | 7.90490000  | -2.41690000 |
| H | 3.62140000  | 6.23370000  | -0.96040000 |
| H | 2.58070000  | 3.98380000  | -0.76040000 |
| C | 1.15390000  | 0.33520000  | 1.39540000  |
| O | -0.25580000 | -0.06340000 | 1.20690000  |
| C | 0.07550000  | 1.05790000  | 2.07340000  |
| C | 2.02440000  | -0.67410000 | 2.07520000  |
| H | 1.59300000  | 0.80670000  | 0.52140000  |
| H | -0.14020000 | 0.85770000  | 3.11990000  |
| H | -0.24440000 | 2.02580000  | 1.69930000  |
| H | 2.98500000  | -0.19960000 | 2.28480000  |
| H | 2.21570000  | -1.51580000 | 1.40290000  |
| H | 1.57620000  | -1.05140000 | 2.99890000  |
| C | -1.91650000 | -1.94820000 | 2.32230000  |
| O | -1.42750000 | -2.84650000 | 1.75710000  |
| O | -2.42250000 | -1.08430000 | 2.92720000  |

## 2-TS1

|    |             |             |             |
|----|-------------|-------------|-------------|
| N  | -0.53180000 | -1.64920000 | -1.60350000 |
| N  | -2.96610000 | -0.72510000 | -0.33440000 |
| N  | 0.31280000  | 1.05820000  | -1.83830000 |
| N  | -2.02730000 | 1.99320000  | -0.44260000 |
| Zn | -1.10060000 | 0.11410000  | -0.61570000 |
| C  | 0.75320000  | -3.27770000 | -2.59210000 |
| C  | -0.47030000 | -3.83140000 | -2.35470000 |
| C  | 0.69350000  | -1.90940000 | -2.11280000 |
| C  | -1.26850000 | -2.81850000 | -1.69700000 |
| C  | -2.56040000 | -3.00150000 | -1.21300000 |

|   |             |             |             |
|---|-------------|-------------|-------------|
| C | -4.65410000 | -2.25190000 | 0.00460000  |
| C | -5.04440000 | -1.08100000 | 0.59150000  |
| C | -3.35000000 | -2.01620000 | -0.56750000 |
| C | -3.98180000 | -0.12990000 | 0.37320000  |
| C | 1.72930000  | -0.92080000 | -2.22040000 |
| C | 1.57600000  | 2.64290000  | -2.95420000 |
| C | 2.15920000  | 1.43060000  | -3.15670000 |
| C | 0.44690000  | 2.42070000  | -2.07430000 |
| C | 1.38360000  | 0.46210000  | -2.40270000 |
| C | -0.26760000 | 3.41700000  | -1.41780000 |
| C | -3.10650000 | 3.58710000  | 0.83180000  |
| C | -2.06820000 | 4.20600000  | 0.19800000  |
| C | -3.08430000 | 2.20240000  | 0.41190000  |
| C | -1.40810000 | 3.19550000  | -0.59910000 |
| C | -4.00630000 | 1.21510000  | 0.79530000  |
| C | 3.09230000  | -1.22930000 | -1.87910000 |
| C | 4.03040000  | -0.18950000 | -1.60550000 |
| C | 5.24720000  | -0.44500000 | -1.04230000 |
| N | 5.64200000  | -1.70600000 | -0.72410000 |
| C | 4.78130000  | -2.73820000 | -0.95840000 |
| C | 3.55370000  | -2.53950000 | -1.52500000 |
| C | 6.61650000  | -3.03410000 | 3.76060000  |
| C | 5.85210000  | -2.01630000 | 4.32950000  |
| C | 5.39310000  | -0.96520000 | 3.53280000  |
| C | 5.69620000  | -0.92450000 | 2.17360000  |
| C | 6.46730000  | -1.94480000 | 1.60100000  |
| C | 6.91970000  | -2.99910000 | 2.39860000  |
| C | 6.82830000  | -1.90900000 | 0.13010000  |
| C | -3.14570000 | -4.36810000 | -1.32340000 |

|    |            |            |            |
|----|------------|------------|------------|
| C  | -4.2550000 | -4.6297000 | -2.1353000 |
| C  | -4.7543000 | -5.9297000 | -2.1969000 |
| N  | -4.2374000 | -6.9613000 | -1.5169000 |
| C  | -3.1799000 | -6.7018000 | -0.7376000 |
| C  | -2.6022000 | -5.4400000 | -0.6061000 |
| C  | -5.1111000 | 1.6116000  | 1.7107000  |
| C  | -6.0556000 | 2.5825000  | 1.3572000  |
| C  | -7.0647000 | 2.9039000  | 2.2635000  |
| N  | -7.1915000 | 2.3391000  | 3.4707000  |
| C  | -6.2834000 | 1.4118000  | 3.8020000  |
| C  | -5.2386000 | 1.0125000  | 2.9705000  |
| C  | 0.2864000  | 4.7973000  | -1.4813000 |
| C  | -0.4441000 | 5.8713000  | -2.0026000 |
| C  | 0.1416000  | 7.1356000  | -2.0236000 |
| N  | 1.3720000  | 7.3952000  | -1.5627000 |
| C  | 2.0597000  | 6.3626000  | -1.0568000 |
| C  | 1.5754000  | 5.0563000  | -0.9929000 |
| Br | 3.6423000  | 2.0239000  | 0.8811000  |
| H  | 1.5723000  | -3.7220000 | -3.1385000 |
| H  | -0.8111000 | -4.8190000 | -2.6269000 |
| H  | -5.1969000 | -3.1839000 | -0.0309000 |
| H  | -5.9713000 | -0.8786000 | 1.1058000  |
| H  | 1.8683000  | 3.5977000  | -3.3641000 |
| H  | 3.0136000  | 1.2016000  | -3.7765000 |
| H  | -3.8112000 | 4.0246000  | 1.5221000  |
| H  | -1.7695000 | 5.2402000  | 0.2742000  |
| H  | 3.7513000  | 0.8508000  | -1.6553000 |
| H  | 5.9071000  | 0.3609000  | -0.7505000 |
| H  | 5.1179000  | -3.7150000 | -0.6343000 |

|   |             |             |             |
|---|-------------|-------------|-------------|
| H | 2.90930000  | -3.39940000 | -1.62050000 |
| H | 6.97270000  | -3.85780000 | 4.37140000  |
| H | 5.61220000  | -2.04300000 | 5.38790000  |
| H | 4.79450000  | -0.16620000 | 3.95820000  |
| H | 5.29960000  | -0.09900000 | 1.58620000  |
| H | 7.51400000  | -3.79490000 | 1.95620000  |
| H | 7.31000000  | -2.84110000 | -0.17530000 |
| H | 7.51900000  | -1.09200000 | -0.09570000 |
| H | -4.71280000 | -3.83340000 | -2.71230000 |
| H | -5.61200000 | -6.15360000 | -2.82800000 |
| H | -2.77330000 | -7.54680000 | -0.18530000 |
| H | -1.75420000 | -5.27950000 | 0.05060000  |
| H | -6.00820000 | 3.06740000  | 0.38830000  |
| H | -7.81120000 | 3.65160000  | 2.00310000  |
| H | -6.39480000 | 0.96350000  | 4.78720000  |
| H | -4.52460000 | 0.26240000  | 3.29130000  |
| H | -1.44420000 | 5.71830000  | -2.39420000 |
| H | -0.40510000 | 7.98220000  | -2.43440000 |
| H | 3.05410000  | 6.58800000  | -0.67750000 |
| H | 2.17700000  | 4.26400000  | -0.55270000 |
| C | 1.21880000  | -0.23430000 | 1.17520000  |
| O | -0.18770000 | 0.03850000  | 1.19450000  |
| C | 1.17360000  | 1.21540000  | 1.24530000  |
| C | 1.73750000  | -1.00860000 | 2.36050000  |
| H | 1.56980000  | -0.64190000 | 0.22890000  |
| H | 1.09570000  | 1.69770000  | 2.20850000  |
| H | 1.01300000  | 1.79300000  | 0.35620000  |
| H | 2.82700000  | -0.93480000 | 2.39430000  |
| H | 1.45240000  | -2.06130000 | 2.28550000  |

|   |             |             |            |
|---|-------------|-------------|------------|
| H | 1.32770000  | -0.59980000 | 3.28940000 |
| O | -1.12690000 | -2.74790000 | 1.75130000 |
| C | -1.73020000 | -1.92940000 | 2.33070000 |
| O | -2.36220000 | -1.16850000 | 2.95240000 |

### 3-Int1

|    |             |             |             |
|----|-------------|-------------|-------------|
| N  | -0.76530000 | -1.67530000 | -1.48800000 |
| N  | -3.04560000 | -0.54090000 | -0.16310000 |
| N  | 0.39390000  | 0.91780000  | -1.71230000 |
| N  | -1.85930000 | 2.06170000  | -0.32820000 |
| Zn | -1.06400000 | 0.09570000  | -0.38150000 |
| C  | 0.40570000  | -3.44700000 | -2.36220000 |
| C  | -0.87320000 | -3.87870000 | -2.17910000 |
| C  | 0.44430000  | -2.06080000 | -1.92370000 |
| C  | -1.60260000 | -2.77660000 | -1.57720000 |
| C  | -2.89860000 | -2.83220000 | -1.07750000 |
| C  | -4.85830000 | -1.90000000 | 0.24440000  |
| C  | -5.09980000 | -0.71310000 | 0.87220000  |
| C  | -3.56410000 | -1.77660000 | -0.39190000 |
| C  | -3.95950000 | 0.13630000  | 0.60510000  |
| C  | 1.58220000  | -1.19010000 | -2.04330000 |
| C  | 1.67600000  | 2.34080000  | -3.00740000 |
| C  | 2.17730000  | 1.08200000  | -3.15000000 |
| C  | 0.58330000  | 2.24820000  | -2.06110000 |
| C  | 1.38160000  | 0.21800000  | -2.29620000 |
| C  | -0.08810000 | 3.32350000  | -1.49090000 |
| C  | -2.80520000 | 3.79440000  | 0.86610000  |
| C  | -1.77550000 | 4.31640000  | 0.13520000  |
| C  | -2.86790000 | 2.38580000  | 0.54530000  |

|   |             |             |             |
|---|-------------|-------------|-------------|
| C | -1.19960000 | 3.21890000  | -0.60850000 |
| C | -3.84610000 | 1.48100000  | 1.00310000  |
| C | 2.87630000  | -1.66800000 | -1.69360000 |
| C | 4.08490000  | -0.91150000 | -1.84650000 |
| C | 5.26330000  | -1.32920000 | -1.30700000 |
| N | 5.36060000  | -2.47520000 | -0.56810000 |
| C | 4.23220000  | -3.22510000 | -0.38240000 |
| C | 3.03600000  | -2.87880000 | -0.93620000 |
| C | 7.08980000  | -1.84710000 | 3.95220000  |
| C | 6.33390000  | -0.68280000 | 4.10230000  |
| C | 5.62020000  | -0.17900000 | 3.01580000  |
| C | 5.66290000  | -0.83300000 | 1.78550000  |
| C | 6.42530000  | -1.99350000 | 1.62690000  |
| C | 7.13410000  | -2.50040000 | 2.72110000  |
| C | 6.53830000  | -2.69060000 | 0.28120000  |
| C | -3.62720000 | -4.12700000 | -1.18950000 |
| C | -4.79570000 | -4.24420000 | -1.95100000 |
| C | -5.43710000 | -5.47960000 | -2.01920000 |
| N | -5.00610000 | -6.58110000 | -1.39080000 |
| C | -3.89120000 | -6.46070000 | -0.65940000 |
| C | -3.17350000 | -5.27320000 | -0.52650000 |
| C | -4.87920000 | 1.99180000  | 1.94550000  |
| C | -5.76460000 | 3.01810000  | 1.59480000  |
| C | -6.71120000 | 3.44150000  | 2.52600000  |
| N | -6.83240000 | 2.92570000  | 3.75570000  |
| C | -5.98360000 | 1.94310000  | 4.08390000  |
| C | -5.00420000 | 1.44300000  | 3.22770000  |
| C | 0.46110000  | 4.68250000  | -1.74560000 |
| C | -0.30220000 | 5.69450000  | -2.33940000 |

|    |             |             |             |
|----|-------------|-------------|-------------|
| C  | 0.28110000  | 6.94290000  | -2.54840000 |
| N  | 1.54000000  | 7.24620000  | -2.20570000 |
| C  | 2.25980000  | 6.27540000  | -1.62840000 |
| C  | 1.77790000  | 4.99150000  | -1.37890000 |
| Br | 3.30550000  | 1.75110000  | 0.47450000  |
| H  | 1.22650000  | -3.98590000 | -2.81390000 |
| H  | -1.28830000 | -4.84230000 | -2.43320000 |
| H  | -5.48910000 | -2.77520000 | 0.22450000  |
| H  | -5.97410000 | -0.43200000 | 1.43930000  |
| H  | 1.99440000  | 3.24110000  | -3.51090000 |
| H  | 2.95230000  | 0.76240000  | -3.83110000 |
| H  | -3.45500000 | 4.31640000  | 1.55150000  |
| H  | -1.43200000 | 5.33950000  | 0.11680000  |
| H  | 4.08000000  | 0.04930000  | -2.33300000 |
| H  | 6.17480000  | -0.75170000 | -1.39840000 |
| H  | 4.34010000  | -4.08540000 | 0.26620000  |
| H  | 2.17270000  | -3.47640000 | -0.68280000 |
| H  | 7.64020000  | -2.25210000 | 4.79570000  |
| H  | 6.29790000  | -0.17730000 | 5.06200000  |
| H  | 5.02170000  | 0.72220000  | 3.10190000  |
| H  | 5.07830000  | -0.42330000 | 0.97110000  |
| H  | 7.72150000  | -3.40890000 | 2.61230000  |
| H  | 6.67020000  | -3.76780000 | 0.41230000  |
| H  | 7.40790000  | -2.32800000 | -0.27750000 |
| H  | -5.19050000 | -3.38630000 | -2.48470000 |
| H  | -6.34300000 | -5.58990000 | -2.61190000 |
| H  | -3.55410000 | -7.36000000 | -0.14780000 |
| H  | -2.28210000 | -5.23020000 | 0.08950000  |
| H  | -5.72150000 | 3.46670000  | 0.60850000  |



|   |             |             |             |
|---|-------------|-------------|-------------|
| H | -7.41080000 | 4.23400000  | 2.26760000  |
| H | -6.09030000 | 1.53260000  | 5.08590000  |
| H | -4.34020000 | 0.64730000  | 3.54720000  |
| H | -1.32640000 | 5.50490000  | -2.64180000 |
| H | -0.29240000 | 7.73950000  | -3.01820000 |
| H | 3.27770000  | 6.53710000  | -1.34640000 |
| H | 2.39380000  | 4.24390000  | -0.88920000 |
| C | 1.19280000  | -0.09550000 | 1.36540000  |
| O | -0.18470000 | -0.27120000 | 1.31070000  |
| C | 1.48760000  | 1.40910000  | 1.25990000  |
| C | 1.77510000  | -0.65240000 | 2.66680000  |
| H | 1.70910000  | -0.58810000 | 0.52520000  |
| H | 1.49070000  | 1.92390000  | 2.22080000  |
| H | 0.81670000  | 1.89750000  | 0.56520000  |
| H | 2.84120000  | -0.42150000 | 2.75570000  |
| H | 1.65830000  | -1.73690000 | 2.70610000  |
| H | 1.24430000  | -0.21450000 | 3.51910000  |
| C | -0.69030000 | -2.77090000 | 1.55510000  |
| O | -1.73660000 | -2.57570000 | 2.03770000  |
| O | 0.32130000  | -3.15370000 | 1.09610000  |

#### 4-TS2

|    |             |             |             |
|----|-------------|-------------|-------------|
| N  | -0.76320000 | -1.67800000 | -1.54050000 |
| N  | -3.06290000 | -0.57870000 | -0.20340000 |
| N  | 0.40230000  | 0.90580000  | -1.68920000 |
| N  | -1.87710000 | 2.02690000  | -0.32050000 |
| Zn | -1.09750000 | 0.07100000  | -0.43310000 |
| C  | 0.50190000  | -3.48310000 | -2.20110000 |
| C  | -0.76860000 | -3.93820000 | -2.02880000 |

|   |             |             |             |
|---|-------------|-------------|-------------|
| C | 0.48470000  | -2.06310000 | -1.88560000 |
| C | -1.55720000 | -2.80950000 | -1.56700000 |
| C | -2.85590000 | -2.88480000 | -1.07170000 |
| C | -4.90530000 | -1.93140000 | 0.07710000  |
| C | -5.19460000 | -0.73620000 | 0.66630000  |
| C | -3.55830000 | -1.82460000 | -0.44270000 |
| C | -4.03300000 | 0.10840000  | 0.48510000  |
| C | 1.60650000  | -1.19150000 | -2.02270000 |
| C | 1.72220000  | 2.35500000  | -2.91040000 |
| C | 2.23820000  | 1.10300000  | -3.05800000 |
| C | 0.60220000  | 2.24090000  | -2.00160000 |
| C | 1.41750000  | 0.21430000  | -2.25780000 |
| C | -0.08320000 | 3.30980000  | -1.42820000 |
| C | -2.88940000 | 3.75730000  | 0.82060000  |
| C | -1.82780000 | 4.28430000  | 0.13990000  |
| C | -2.93240000 | 2.34950000  | 0.49860000  |
| C | -1.21240000 | 3.19290000  | -0.57790000 |
| C | -3.94510000 | 1.45060000  | 0.89050000  |
| C | 2.91480000  | -1.68800000 | -1.66680000 |
| C | 4.15300000  | -1.06710000 | -1.99770000 |
| C | 5.32960000  | -1.47360000 | -1.42980000 |
| N | 5.37350000  | -2.48010000 | -0.51580000 |
| C | 4.21830000  | -3.11640000 | -0.17820000 |
| C | 3.01920000  | -2.76650000 | -0.73530000 |
| C | 7.27400000  | -1.53730000 | 3.87000000  |
| C | 6.47780000  | -0.39430000 | 3.97370000  |
| C | 5.69770000  | 0.00320000  | 2.88830000  |
| C | 5.71440000  | -0.73600000 | 1.70570000  |
| C | 6.51350000  | -1.87740000 | 1.59520000  |

|    |             |             |             |
|----|-------------|-------------|-------------|
| C  | 7.29010000  | -2.27730000 | 2.68790000  |
| C  | 6.57890000  | -2.67800000 | 0.30550000  |
| C  | -3.52160000 | -4.21810000 | -1.09410000 |
| C  | -3.89810000 | -4.83760000 | -2.29010000 |
| C  | -4.50250000 | -6.09300000 | -2.23820000 |
| N  | -4.74940000 | -6.75620000 | -1.10000000 |
| C  | -4.38250000 | -6.15570000 | 0.04220000  |
| C  | -3.77340000 | -4.90440000 | 0.10020000  |
| C  | -5.04410000 | 1.96830000  | 1.75170000  |
| C  | -5.89180000 | 3.00200000  | 1.33410000  |
| C  | -6.90700000 | 3.43090000  | 2.18660000  |
| N  | -7.13120000 | 2.91220000  | 3.40240000  |
| C  | -6.31800000 | 1.92120000  | 3.79490000  |
| C  | -5.27640000 | 1.41770000  | 3.01840000  |
| C  | 0.46760000  | 4.67440000  | -1.65420000 |
| C  | -0.27950000 | 5.68540000  | -2.26990000 |
| C  | 0.30100000  | 6.93990000  | -2.44690000 |
| N  | 1.54520000  | 7.24990000  | -2.05470000 |
| C  | 2.25110000  | 6.27800000  | -1.45890000 |
| C  | 1.76770000  | 4.99020000  | -1.23790000 |
| Br | 3.21700000  | 1.70090000  | 0.48500000  |
| H  | 1.35980000  | -4.03800000 | -2.55290000 |
| H  | -1.13790000 | -4.94060000 | -2.18370000 |
| H  | -5.54400000 | -2.79730000 | -0.00660000 |
| H  | -6.11600000 | -0.44250000 | 1.14570000  |
| H  | 2.05410000  | 3.26490000  | -3.38730000 |
| H  | 3.03210000  | 0.81400000  | -3.72890000 |
| H  | -3.57660000 | 4.27830000  | 1.46940000  |
| H  | -1.49340000 | 5.31050000  | 0.13450000  |

|   |             |             |             |
|---|-------------|-------------|-------------|
| H | 4.20310000  | -0.23460000 | -2.67750000 |
| H | 6.27440000  | -0.99660000 | -1.65560000 |
| H | 4.29900000  | -3.87310000 | 0.59150000  |
| H | 2.12800000  | -3.24340000 | -0.35340000 |
| H | 7.87740000  | -1.85910000 | 4.71300000  |
| H | 6.46300000  | 0.17710000  | 4.89630000  |
| H | 5.06850000  | 0.88610000  | 2.94100000  |
| H | 5.08350000  | -0.41010000 | 0.88770000  |
| H | 7.90540000  | -3.17010000 | 2.61610000  |
| H | 6.67740000  | -3.74580000 | 0.51220000  |
| H | 7.43800000  | -2.38370000 | -0.30400000 |
| H | -3.72780000 | -4.34620000 | -3.24180000 |
| H | -4.80530000 | -6.58760000 | -3.15880000 |
| H | -4.58200000 | -6.70520000 | 0.95980000  |
| H | -3.48200000 | -4.46720000 | 1.04910000  |
| H | -5.76930000 | 3.45330000  | 0.35600000  |
| H | -7.57640000 | 4.22910000  | 1.87300000  |
| H | -6.50650000 | 1.50660000  | 4.78290000  |
| H | -4.64820000 | 0.61610000  | 3.39010000  |
| H | -1.28990000 | 5.49310000  | -2.61330000 |
| H | -0.26250000 | 7.73440000  | -2.93140000 |
| H | 3.25670000  | 6.54170000  | -1.13760000 |
| H | 2.37250000  | 4.24260000  | -0.73560000 |
| C | 1.18770000  | -0.17280000 | 1.39810000  |
| O | -0.20220000 | -0.40080000 | 1.31670000  |
| C | 1.42230000  | 1.33730000  | 1.27350000  |
| C | 1.77850000  | -0.67620000 | 2.71580000  |
| H | 1.70850000  | -0.66800000 | 0.56920000  |
| H | 1.41450000  | 1.85530000  | 2.23170000  |

|   |             |             |            |
|---|-------------|-------------|------------|
| H | 0.73160000  | 1.80160000  | 0.58260000 |
| H | 2.83200000  | -0.39010000 | 2.79280000 |
| H | 1.71320000  | -1.76210000 | 2.78520000 |
| H | 1.23280000  | -0.23450000 | 3.55670000 |
| C | -0.63580000 | -2.31900000 | 1.56480000 |
| O | -1.72060000 | -2.27870000 | 2.05170000 |
| O | 0.31540000  | -2.91600000 | 1.15700000 |

### 5-Int2

|    |             |             |             |
|----|-------------|-------------|-------------|
| N  | 0.90860000  | 1.88400000  | -0.99150000 |
| N  | 3.51170000  | 1.04020000  | -0.05470000 |
| N  | 0.08470000  | -0.85650000 | -1.30680000 |
| N  | 2.69960000  | -1.70970000 | -0.32650000 |
| Zn | 1.64570000  | 0.09500000  | -0.19620000 |
| C  | -0.62480000 | 3.51610000  | -1.52200000 |
| C  | 0.56040000  | 4.14700000  | -1.30700000 |
| C  | -0.38910000 | 2.09730000  | -1.31190000 |
| C  | 1.51440000  | 3.12050000  | -0.93500000 |
| C  | 2.83240000  | 3.36380000  | -0.54210000 |
| C  | 5.11370000  | 2.66200000  | 0.29930000  |
| C  | 5.67560000  | 1.46560000  | 0.62830000  |
| C  | 3.75960000  | 2.38140000  | -0.13150000 |
| C  | 4.66340000  | 0.45470000  | 0.40290000  |
| C  | -1.37630000 | 1.10020000  | -1.52880000 |
| C  | -1.42620000 | -2.51840000 | -1.85060000 |
| C  | -2.08240000 | -1.32970000 | -1.94010000 |
| C  | -0.07780000 | -2.22090000 | -1.41340000 |
| C  | -1.11570000 | -0.29270000 | -1.61530000 |
| C  | 0.86880000  | -3.18980000 | -1.07640000 |

|   |             |             |             |
|---|-------------|-------------|-------------|
| C | 4.18590000  | -3.35060000 | 0.33540000  |
| C | 3.07860000  | -3.97960000 | -0.14660000 |
| C | 3.94740000  | -1.92780000 | 0.20540000  |
| C | 2.15610000  | -2.94160000 | -0.55640000 |
| C | 4.86510000  | -0.92720000 | 0.56580000  |
| C | -2.76010000 | 1.54110000  | -1.46840000 |
| C | -3.77610000 | 1.16180000  | -2.37860000 |
| C | -5.07780000 | 1.54950000  | -2.17710000 |
| N | -5.42970000 | 2.31020000  | -1.10760000 |
| C | -4.47470000 | 2.71210000  | -0.21870000 |
| C | -3.16020000 | 2.36750000  | -0.38170000 |
| C | -8.70220000 | 1.76390000  | 2.41390000  |
| C | -8.20270000 | 0.49550000  | 2.71220000  |
| C | -7.25180000 | -0.09090000 | 1.87600000  |
| C | -6.80660000 | 0.58620000  | 0.74270000  |
| C | -7.30650000 | 1.85590000  | 0.43930000  |
| C | -8.25120000 | 2.44570000  | 1.28350000  |
| C | -6.84740000 | 2.58760000  | -0.80480000 |
| C | 3.29260000  | 4.78300000  | -0.52540000 |
| C | 4.27600000  | 5.24120000  | -1.40990000 |
| C | 4.66760000  | 6.57770000  | -1.35510000 |
| N | 4.15850000  | 7.47100000  | -0.49690000 |
| C | 3.22050000  | 7.02550000  | 0.34880000  |
| C | 2.75840000  | 5.71070000  | 0.37630000  |
| C | 6.17360000  | -1.35910000 | 1.13410000  |
| C | 7.09180000  | -2.10620000 | 0.38640000  |
| C | 8.30120000  | -2.47630000 | 0.97200000  |
| N | 8.65270000  | -2.16020000 | 2.22490000  |
| C | 7.77120000  | -1.44380000 | 2.93440000  |

|    |             |             |             |
|----|-------------|-------------|-------------|
| C  | 6.53670000  | -1.02220000 | 2.44370000  |
| C  | 0.46870000  | -4.62050000 | -1.23230000 |
| C  | 1.00760000  | -5.42400000 | -2.24260000 |
| C  | 0.59590000  | -6.75230000 | -2.34310000 |
| N  | -0.29510000 | -7.32250000 | -1.52190000 |
| C  | -0.80210000 | -6.54980000 | -0.55280000 |
| C  | -0.45750000 | -5.21210000 | -0.36600000 |
| Br | -4.67720000 | -2.29420000 | 0.37270000  |
| H  | -1.55480000 | 3.96320000  | -1.84180000 |
| H  | 0.77520000  | 5.20080000  | -1.39750000 |
| H  | 5.56960000  | 3.63920000  | 0.34230000  |
| H  | 6.68090000  | 1.28080000  | 0.97450000  |
| H  | -1.82890000 | -3.50360000 | -2.03050000 |
| H  | -3.13270000 | -1.20450000 | -2.14200000 |
| H  | 5.07510000  | -3.80320000 | 0.74610000  |
| H  | 2.89520000  | -5.04150000 | -0.20750000 |
| H  | -3.53560000 | 0.58330000  | -3.26000000 |
| H  | -5.87920000 | 1.27940000  | -2.85310000 |
| H  | -4.83480000 | 3.26280000  | 0.64070000  |
| H  | -2.43240000 | 2.61430000  | 0.38270000  |
| H  | -9.43370000 | 2.22960000  | 3.06650000  |
| H  | -8.54730000 | -0.02940000 | 3.59740000  |
| H  | -6.84180000 | -1.07190000 | 2.09190000  |
| H  | -6.05110000 | 0.11950000  | 0.12050000  |
| H  | -8.63340000 | 3.43850000  | 1.06060000  |
| H  | -6.96920000 | 3.66830000  | -0.68880000 |
| H  | -7.42290000 | 2.28750000  | -1.68510000 |
| H  | 4.72150000  | 4.56420000  | -2.13090000 |
| H  | 5.42760000  | 6.95010000  | -2.03920000 |

|   |             |             |             |
|---|-------------|-------------|-------------|
| H | 2.81770000  | 7.75790000  | 1.04590000  |
| H | 2.00130000  | 5.40350000  | 1.08970000  |
| H | 6.86600000  | -2.38490000 | -0.63710000 |
| H | 9.02660000  | -3.05380000 | 0.40220000  |
| H | 8.06520000  | -1.19450000 | 3.95210000  |
| H | 5.85990000  | -0.44800000 | 3.06690000  |
| H | 1.73160000  | -5.01490000 | -2.93910000 |
| H | 1.00170000  | -7.38990000 | -3.12610000 |
| H | -1.52030000 | -7.02490000 | 0.11260000  |
| H | -0.88950000 | -4.63690000 | 0.44580000  |
| C | -2.55950000 | -0.78580000 | 1.65560000  |
| O | -1.14340000 | -0.83820000 | 1.83650000  |
| C | -2.91460000 | -2.22000000 | 1.28260000  |
| C | -3.28760000 | -0.28690000 | 2.89570000  |
| H | -2.78410000 | -0.13280000 | 0.80890000  |
| H | -3.00320000 | -2.88030000 | 2.14460000  |
| H | -2.21520000 | -2.61360000 | 0.55180000  |
| H | -4.37090000 | -0.32290000 | 2.74430000  |
| H | -2.98480000 | 0.74060000  | 3.09800000  |
| H | -3.03170000 | -0.91070000 | 3.75820000  |
| C | -0.45330000 | 0.37280000  | 1.67800000  |
| O | 0.80310000  | 0.18770000  | 1.61450000  |
| O | -1.09950000 | 1.42320000  | 1.62020000  |

### 6-TS3

|   |             |             |             |
|---|-------------|-------------|-------------|
| N | 1.10530000  | 2.06600000  | -0.93370000 |
| N | 3.53860000  | 0.75800000  | -0.11570000 |
| N | -0.11450000 | -0.50100000 | -1.41620000 |
| N | 2.25600000  | -1.81900000 | -0.41450000 |



|    |             |             |             |
|----|-------------|-------------|-------------|
| Zn | 1.56990000  | 0.14210000  | -0.31580000 |
| C  | -0.19250000 | 3.94250000  | -1.22470000 |
| C  | 1.08130000  | 4.37260000  | -1.00440000 |
| C  | -0.15620000 | 2.49240000  | -1.19090000 |
| C  | 1.88940000  | 3.18910000  | -0.79010000 |
| C  | 3.25210000  | 3.18680000  | -0.47440000 |
| C  | 5.41450000  | 2.05930000  | 0.20210000  |
| C  | 5.76070000  | 0.77510000  | 0.49920000  |
| C  | 4.01720000  | 2.03900000  | -0.17440000 |
| C  | 4.57480000  | -0.03220000 | 0.30880000  |
| C  | -1.25210000 | 1.66860000  | -1.54640000 |
| C  | -1.76270000 | -1.84160000 | -2.32250000 |
| C  | -2.21380000 | -0.56170000 | -2.36690000 |
| C  | -0.47300000 | -1.81340000 | -1.66860000 |
| C  | -1.16890000 | 0.27460000  | -1.80580000 |
| C  | 0.22400000  | -2.95120000 | -1.24950000 |
| C  | 3.33170000  | -3.66110000 | 0.46840000  |
| C  | 2.13790000  | -4.08880000 | -0.02850000 |
| C  | 3.40870000  | -2.23970000 | 0.20590000  |
| C  | 1.48050000  | -2.92950000 | -0.59600000 |
| C  | 4.50740000  | -1.42310000 | 0.51960000  |
| C  | -2.58640000 | 2.23430000  | -1.40630000 |
| C  | -3.63910000 | 2.09070000  | -2.34180000 |
| C  | -4.92480000 | 2.44060000  | -2.00950000 |
| N  | -5.21870000 | 2.96620000  | -0.79410000 |
| C  | -4.21590000 | 3.21150000  | 0.09610000  |
| C  | -2.91670000 | 2.88720000  | -0.19000000 |
| C  | -7.86440000 | 1.96150000  | 3.05740000  |
| C  | -7.41400000 | 0.64150000  | 3.08440000  |

|    |             |             |             |
|----|-------------|-------------|-------------|
| C  | -6.70680000 | 0.12210000  | 1.99790000  |
| C  | -6.45870000 | 0.91920000  | 0.88270000  |
| C  | -6.90540000 | 2.24580000  | 0.85390000  |
| C  | -7.60260000 | 2.76630000  | 1.94730000  |
| C  | -6.62360000 | 3.12220000  | -0.34620000 |
| C  | 3.94700000  | 4.50510000  | -0.41340000 |
| C  | 4.94010000  | 4.84530000  | -1.33940000 |
| C  | 5.55810000  | 6.09090000  | -1.24370000 |
| N  | 5.26130000  | 7.00240000  | -0.30860000 |
| C  | 4.31280000  | 6.67010000  | 0.57610000  |
| C  | 3.63530000  | 5.45180000  | 0.56940000  |
| C  | 5.70900000  | -2.07980000 | 1.10640000  |
| C  | 6.42090000  | -3.06470000 | 0.41060000  |
| C  | 7.54060000  | -3.64140000 | 1.00730000  |
| N  | 7.99090000  | -3.31290000 | 2.22480000  |
| C  | 7.30580000  | -2.37110000 | 2.88620000  |
| C  | 6.17600000  | -1.73130000 | 2.37990000  |
| C  | -0.40790000 | -4.28010000 | -1.48760000 |
| C  | 0.28460000  | -5.29800000 | -2.15930000 |
| C  | -0.33380000 | -6.53070000 | -2.35540000 |
| N  | -1.57380000 | -6.81980000 | -1.94050000 |
| C  | -2.23630000 | -5.84090000 | -1.31050000 |
| C  | -1.71250000 | -4.57310000 | -1.06160000 |
| Br | -4.55540000 | -2.01580000 | 0.09620000  |
| H  | -1.05870000 | 4.54750000  | -1.45250000 |
| H  | 1.44320000  | 5.38940000  | -0.99860000 |
| H  | 6.04110000  | 2.93710000  | 0.24020000  |
| H  | 6.72690000  | 0.40690000  | 0.80800000  |
| H  | -2.28390000 | -2.72040000 | -2.66310000 |

|   |             |             |             |
|---|-------------|-------------|-------------|
| H | -3.18750000 | -0.26080000 | -2.70970000 |
| H | 4.08120000  | -4.24750000 | 0.97700000  |
| H | 1.73290000  | -5.08800000 | 0.00290000  |
| H | -3.44750000 | 1.69540000  | -3.32930000 |
| H | -5.75960000 | 2.30580000  | -2.68540000 |
| H | -4.52560000 | 3.60060000  | 1.05740000  |
| H | -2.15740000 | 3.00430000  | 0.57150000  |
| H | -8.40740000 | 2.37180000  | 3.90300000  |
| H | -7.60790000 | 0.02070000  | 3.95350000  |
| H | -6.32560000 | -0.89450000 | 1.98780000  |
| H | -5.89580000 | 0.47900000  | 0.06300000  |
| H | -7.94050000 | 3.79950000  | 1.93360000  |
| H | -6.79640000 | 4.17640000  | -0.11220000 |
| H | -7.25280000 | 2.86320000  | -1.20170000 |
| H | 5.21830000  | 4.14900000  | -2.12330000 |
| H | 6.32910000  | 6.37170000  | -1.95860000 |
| H | 4.08350000  | 7.41550000  | 1.33520000  |
| H | 2.88220000  | 5.23290000  | 1.31860000  |
| H | 6.10840000  | -3.36600000 | -0.58330000 |
| H | 8.10680000  | -4.40440000 | 0.47680000  |
| H | 7.67740000  | -2.11500000 | 3.87640000  |
| H | 5.65710000  | -0.98010000 | 2.96510000  |
| H | 1.28800000  | -5.12370000 | -2.53150000 |
| H | 0.19500000  | -7.32560000 | -2.87810000 |
| H | -3.24610000 | -6.07620000 | -0.98120000 |
| H | -2.33100000 | -3.83280000 | -0.56490000 |
| C | -2.16390000 | -1.37940000 | 2.29690000  |
| O | -0.72600000 | -1.24660000 | 2.17260000  |
| C | -2.74600000 | -0.57570000 | 1.14750000  |

|   |             |             |            |
|---|-------------|-------------|------------|
| C | -2.44690000 | -2.86600000 | 2.39100000 |
| H | -2.46670000 | -0.88060000 | 3.22620000 |
| H | -2.36280000 | -0.69610000 | 0.15240000 |
| H | -3.55020000 | 0.11980000  | 1.30870000 |
| H | -3.51880000 | -3.04700000 | 2.44770000 |
| H | -1.94500000 | -3.26160000 | 3.27840000 |
| H | -2.05840000 | -3.37830000 | 1.51070000 |
| C | -0.38800000 | -0.00310000 | 1.74160000 |
| O | 0.82700000  | 0.24920000  | 1.60790000 |
| O | -1.37650000 | 0.76620000  | 1.49490000 |

### 7-P1

|    |             |             |             |
|----|-------------|-------------|-------------|
| N  | 1.08160000  | 2.04340000  | -0.81200000 |
| N  | 3.56740000  | 0.75250000  | -0.13000000 |
| N  | -0.07170000 | -0.53140000 | -1.39530000 |
| N  | 2.33200000  | -1.84370000 | -0.47370000 |
| Zn | 1.62080000  | 0.10120000  | -0.37190000 |
| C  | -0.23050000 | 3.90480000  | -1.12660000 |
| C  | 1.03950000  | 4.34760000  | -0.90090000 |
| C  | -0.18480000 | 2.45760000  | -1.08060000 |
| C  | 1.85810000  | 3.17590000  | -0.68150000 |
| C  | 3.22840000  | 3.18820000  | -0.39680000 |
| C  | 5.41960000  | 2.08280000  | 0.20920000  |
| C  | 5.79740000  | 0.79580000  | 0.45300000  |
| C  | 4.01900000  | 2.04740000  | -0.14720000 |
| C  | 4.62780000  | -0.02960000 | 0.25130000  |
| C  | -1.27080000 | 1.61620000  | -1.43020000 |
| C  | -1.76730000 | -1.88730000 | -2.19100000 |
| C  | -2.24790000 | -0.62180000 | -2.16330000 |

|   |             |             |             |
|---|-------------|-------------|-------------|
| C | -0.43420000 | -1.84700000 | -1.63470000 |
| C | -1.17410000 | 0.22670000  | -1.68320000 |
| C | 0.28090000  | -2.98430000 | -1.24530000 |
| C | 3.45210000  | -3.68120000 | 0.36180000  |
| C | 2.24690000  | -4.11670000 | -0.09950000 |
| C | 3.50680000  | -2.25670000 | 0.11260000  |
| C | 1.56070000  | -2.96040000 | -0.63900000 |
| C | 4.59540000  | -1.42840000 | 0.42060000  |
| C | -2.61290000 | 2.18090000  | -1.33840000 |
| C | -3.63240000 | 1.99580000  | -2.29990000 |
| C | -4.92790000 | 2.36580000  | -2.02890000 |
| N | -5.25980000 | 2.95970000  | -0.85710000 |
| C | -4.29090000 | 3.23810000  | 0.05620000  |
| C | -2.98490000 | 2.89020000  | -0.16850000 |
| C | -8.11270000 | 2.07880000  | 2.87850000  |
| C | -7.67180000 | 0.75530000  | 2.94740000  |
| C | -6.90710000 | 0.21880000  | 1.90990000  |
| C | -6.59380000 | 1.00030000  | 0.80080000  |
| C | -7.03300000 | 2.32560000  | 0.72990000  |
| C | -7.78700000 | 2.86840000  | 1.77470000  |
| C | -6.67970000 | 3.16740000  | -0.47520000 |
| C | 3.90370000  | 4.51600000  | -0.32840000 |
| C | 4.88610000  | 4.88010000  | -1.25710000 |
| C | 5.48500000  | 6.13450000  | -1.15430000 |
| N | 5.17940000  | 7.03330000  | -0.20970000 |
| C | 4.24100000  | 6.67890000  | 0.67710000  |
| C | 3.58250000  | 5.45040000  | 0.66340000  |
| C | 5.82090000  | -2.07720000 | 0.96590000  |
| C | 6.53420000  | -3.03110000 | 0.22970000  |

|    |             |             |             |
|----|-------------|-------------|-------------|
| C  | 7.67470000  | -3.60540000 | 0.78830000  |
| N  | 8.14400000  | -3.30280000 | 2.00530000  |
| C  | 7.45750000  | -2.39080000 | 2.70560000  |
| C  | 6.30780000  | -1.75620000 | 2.23920000  |
| C  | -0.37470000 | -4.31190000 | -1.42770000 |
| C  | 0.27450000  | -5.35280000 | -2.10650000 |
| C  | -0.36240000 | -6.58470000 | -2.23790000 |
| N  | -1.58200000 | -6.85060000 | -1.75370000 |
| C  | -2.20630000 | -5.84850000 | -1.12050000 |
| C  | -1.66000000 | -4.58020000 | -0.92970000 |
| Br | -4.68170000 | -1.72660000 | -0.15690000 |
| H  | -1.09810000 | 4.50230000  | -1.36760000 |
| H  | 1.39250000  | 5.36760000  | -0.90320000 |
| H  | 6.02800000  | 2.97170000  | 0.27320000  |
| H  | 6.77580000  | 0.43800000  | 0.73450000  |
| H  | -2.31230000 | -2.76750000 | -2.48500000 |
| H  | -3.27590000 | -0.36010000 | -2.33500000 |
| H  | 4.22280000  | -4.26420000 | 0.84210000  |
| H  | 1.85320000  | -5.12020000 | -0.06360000 |
| H  | -3.41080000 | 1.54110000  | -3.25470000 |
| H  | -5.74010000 | 2.19230000  | -2.72280000 |
| H  | -4.63170000 | 3.68380000  | 0.98150000  |
| H  | -2.24590000 | 3.07930000  | 0.59870000  |
| H  | -8.70050000 | 2.50180000  | 3.68730000  |
| H  | -7.92070000 | 0.14800000  | 3.81260000  |
| H  | -6.52650000 | -0.79860000 | 1.92110000  |
| H  | -5.97920000 | 0.53740000  | 0.03050000  |
| H  | -8.12050000 | 3.90230000  | 1.72740000  |
| H  | -6.82860000 | 4.23260000  | -0.27710000 |

|   |             |             |             |
|---|-------------|-------------|-------------|
| H | -7.27640000 | 2.90430000  | -1.35240000 |
| H | 5.17060000  | 4.19530000  | -2.04860000 |
| H | 6.24720000  | 6.43330000  | -1.87110000 |
| H | 4.00440000  | 7.41420000  | 1.44380000  |
| H | 2.83670000  | 5.21440000  | 1.41460000  |
| H | 6.20640000  | -3.31080000 | -0.76560000 |
| H | 8.24210000  | -4.34450000 | 0.22610000  |
| H | 7.84470000  | -2.15570000 | 3.69500000  |
| H | 5.78910000  | -1.02970000 | 2.85510000  |
| H | 1.25890000  | -5.19740000 | -2.53410000 |
| H | 0.13300000  | -7.39820000 | -2.76470000 |
| H | -3.20250000 | -6.06430000 | -0.74100000 |
| H | -2.25170000 | -3.81580000 | -0.43540000 |
| C | -2.00400000 | -1.24900000 | 2.89940000  |
| O | -0.56010000 | -0.99400000 | 3.02580000  |
| C | -2.45160000 | -0.08590000 | 2.00190000  |
| C | -2.20850000 | -2.62380000 | 2.29840000  |
| H | -2.41700000 | -1.17450000 | 3.90660000  |
| H | -3.16290000 | -0.39870000 | 1.22620000  |
| H | -2.82840000 | 0.76950000  | 2.57060000  |
| H | -3.26010000 | -2.75350000 | 2.02520000  |
| H | -1.88530000 | -3.40350000 | 2.99210000  |
| H | -1.63060000 | -2.71200000 | 1.37480000  |
| C | -0.17740000 | -0.22620000 | 2.00810000  |
| O | 0.98900000  | -0.04560000 | 1.69430000  |
| O | -1.21000000 | 0.32270000  | 1.36590000  |

## 5. Characterization Data for Products

**4-methyl-1,3-dioxolan-2-one (2a):**  $^1\text{H NMR}$  (600 MHz,  $\text{CDCl}_3$ , 25 °C):  $\delta$  (ppm) = 4.8 (m, 1H, ring CH- $\text{CH}_3$ ), 4.5 (t, 1H, ring  $\text{CH}_2$ ), 4.0 (t, 1H, ring  $\text{CH}_2$ ), 1.4 (d, 3H,  $\text{CH}_3$ ).

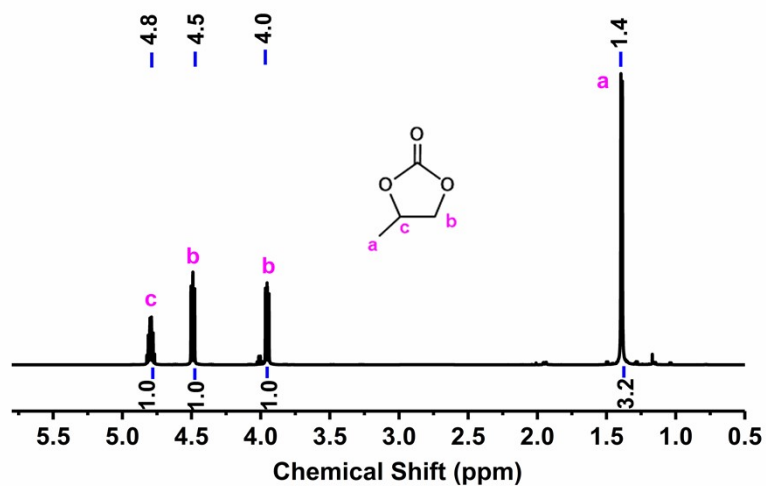

**4-ethyl-1,3-dioxolan-2-one (2b):**  $^1\text{H NMR}$  (600 MHz,  $\text{CDCl}_3$ , 25 °C):  $\delta$  (ppm) = 4.6 (m, 1H), 4.5 (t,  $J = 10$  Hz, 1H), 4.0 (t,  $J = 10$  Hz, 1H), 1.7 (m, 2H), 1.0 (t,  $J = 10$  Hz, 3H).

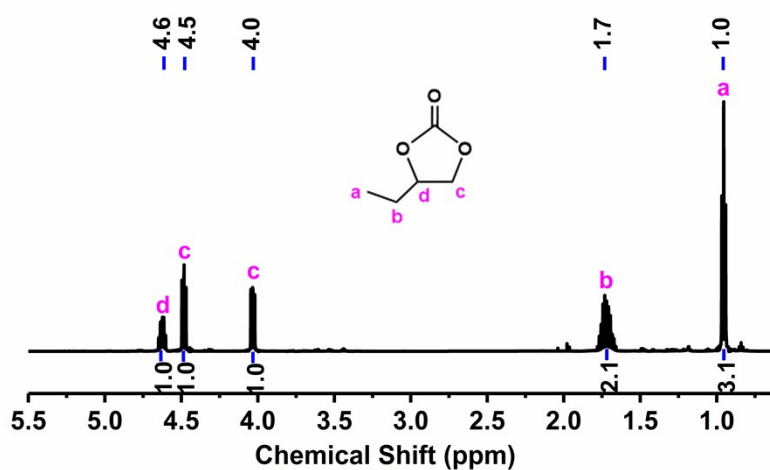



**4-(chloromethyl)-1,3-dioxolan-2-one (2c):**  $^1\text{H}$  NMR (600 MHz,  $\text{CDCl}_3$ , 25  $^\circ\text{C}$ ):  $\delta$  (ppm) = 5.0 (m, 1H, CH- $\text{CH}_2$ ), 4.6 (t,  $J = 8$  Hz, 1H, ring  $\text{CH}_2$ ), 4.4 (dd,  $J = 8$  Hz, 4 Hz, 1H, ring  $\text{CH}_2$ ), 3.8 (m, 1H,  $\text{CH}_2\text{-Cl}$ ), 3.7 (m, 1H,  $\text{CH}_2\text{-Cl}$ ).

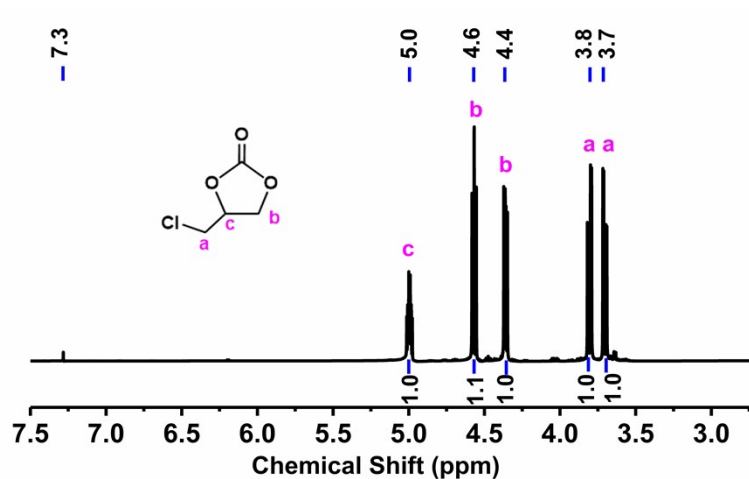

**4-((allyloxy)methyl)-1,3-dioxolan-2-one (2d):**  $^1\text{H}$  NMR (600 MHz,  $\text{CDCl}_3$ , 25  $^\circ\text{C}$ ):  $\delta$  (ppm) = 5.8 (m, 1H), 5.3 (d,  $J = 10$  Hz, 1H), 5.2 (d,  $J = 10$  Hz, 1H), 4.8 (m, 1H), 4.5 (t,  $J = 8$  Hz, 1H), 4.4 (d,  $J = 8$  Hz, 1H), 4.0 (m, 2H), 3.7 (m, 1H), 3.6 (m, 1H).

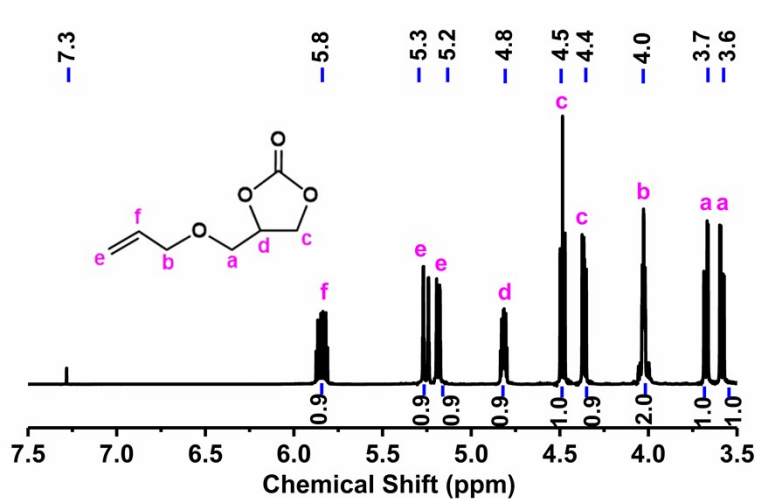

**4-(butoxymethyl)-1,3-dioxolan-2-one (2e):**  $^1\text{H}$  NMR (600 MHz,  $\text{CDCl}_3$ , 25 °C):  $\delta$  (ppm) = 4.8 (m, 1H), 4.4 (d,  $J = 10$  Hz, 1H), 4.3 (d,  $J = 10$  Hz, 1H), 3.6 (t,  $J = 8$  Hz, 1H), 3.5 (d,  $J = 8$  Hz, 1H), 3.4 (m, 2H), 1.5 (m, 2H), 1.3 (m, 2H), 0.9 (d, 3H,  $\text{CH}_3$ ).

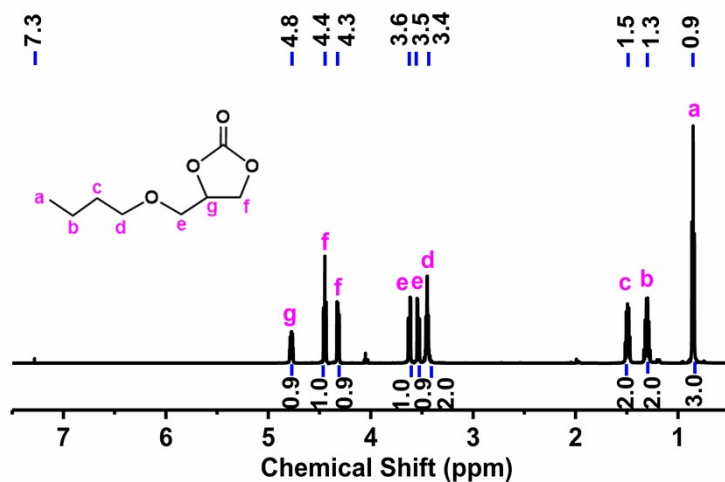

**4-phenyl-1,3-dioxolan-2-one (2f):**  $^1\text{H}$  NMR (600 MHz,  $\text{CDCl}_3$ , 25 °C):  $\delta$  (ppm) = 7.3-7.4 (m, 5H, ring ArH), 5.7 (t,  $J = 8$  Hz, 1H, PhCHO), 4.8 (t,  $J = 8$  Hz, 1H,  $\text{OCH}_2$ ), 4.3 (t,  $J = 8$  Hz, 1H,  $\text{OCH}_2$ ).

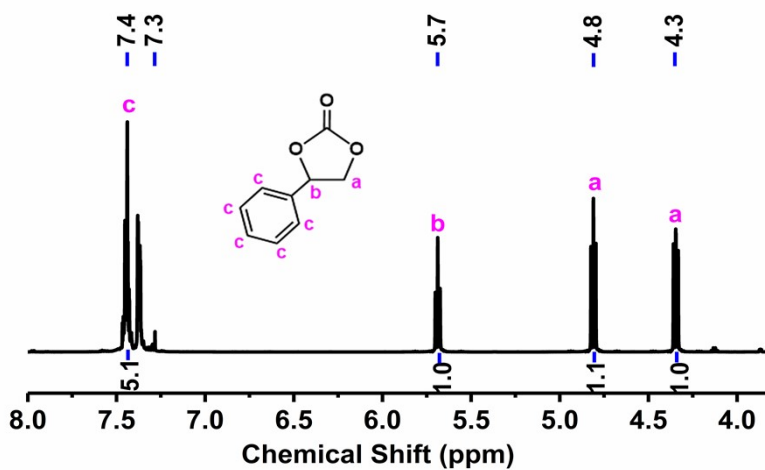

**4,4'-((ethane-1,2-diylbis(oxy))bis(methylene))bis(1,3-dioxolan-2-one):**  $^1\text{H}$  NMR (600 MHz,  $\text{CDCl}_3$ , 25 °C):  $\delta$  (ppm) = 4.8 (m, 1H), 4.5-4.3 (m, 2H), 3.9-3.5 (m, 4H).

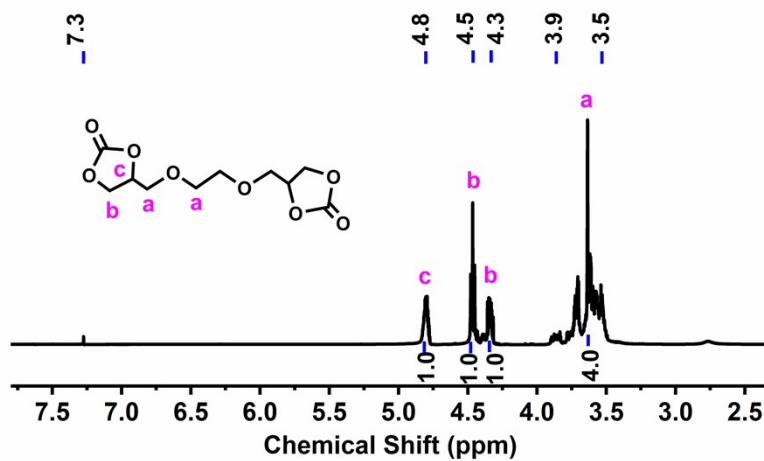

**3-hydroxy-3-methyl-2-butanone:**  $^1\text{H}$  NMR (600 MHz,  $\text{CDCl}_3$ , 25 °C):  $\delta$  (ppm) = 3.8 (s, 1H, OH), 2.2 (s, 3H,  $\text{CH}_3$ ), 1.3 (s, 6H, 2  $\text{CH}_3$ ).

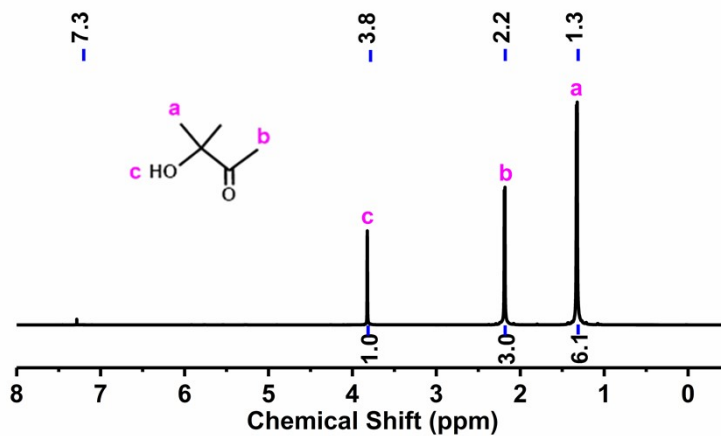

## 6. References

- [1] W. Wang, Y. Wang, C. Li, L. Yan, M. Jiang and Y. Ding, *ACS Sustainable Chemistry & Engineering*, 2017, 5, 4523-4528.
- [2] J. Sun, W. Cheng, W. Fan, Y. Wang, Z. Meng and S. Zhang, *Catalysis Today*, 2009, 148, 361-367.
- [3] H. Li, C. Li, J. Chen, L. Liu and Q. Yang, *Chemistry-An Asian Journal*, 2017, 12, 1095-1103.
- [4] J. Wang, W. Sng, G. Yi and Y. Zhang, *Chemical Communications*, 2015, 51, 12076-12079.
- [5] T.-T. Liu, J. Liang, Y.-B. Huang and R. Cao, *Chemical Communications*, 2016, 52, 13288-13291.
- [6] Y. Xie, J. Liang, Y. Fu, J. Lin, H. Wang, S. Tu and J. Li, *Journal of CO<sub>2</sub> Utilization*, 2019, 32, 281-289.
- [7] Y. Xie, Z. Zhang, T. Jiang, J. He, B. Han, T. Wu and K. Ding, *Angewandte Chemie International Edition*, 2007, 46, 7255-7258.
- [8] Y. Chen, R. Luo, Q. Xu, J. Jiang, X. Zhou and H. Ji, *ACS Sustainable Chemistry & Engineering*, 2018, 6, 1074-1082.
- [9] C. Cui, R. Sa, Z. Hong, H. Zhong and R. Wang, *ChemSusChem*, 2020, 13, 180-187.
- [10] L. Liu, S. Jayakumar, J. Chen, L. Tao, H. Li, Q. Yang and C. Li, *ACS Appl. Mater. Interfaces*, 2021, 13, 29522-29531.
- [11] J. Li, Y. Han, T. Ji, N. Wu, H. Lin, J. Jiang and J. Zhu, *Industrial & Engineering Chemistry Research*, 2019, 59, 676-684.
- [12] D. Ma, J. Li, K. Liu, B. Li, C. Li and Z. Shi, *Green Chemistry*, 2018, 20, 5285-5291.
- [13] R. Luo, Y. Chen, Q. He, X. Lin, Q. Xu, X. He, W. Zhang, X. Zhou and H. Ji, *ChemSusChem*, 2017, 10, 1526-1533.
